# Supplementary material for: Sm2, a paralog of the Trichoderma cerato-platanin elicitor Sm1, is also highly important for plant protection conferred by the fungal-root interaction of Trichoderma with maize
Source: PubMed Central journal article supplement (PMC4320488; doi:10.1186/s12866-014-0333-0), 2015-01-16
Supplement: 12866_2014_333_MOESM1_ESM.pdf [file 12866_2014_333_MOESM1_ESM.pdf]

Fig. S1  
a)

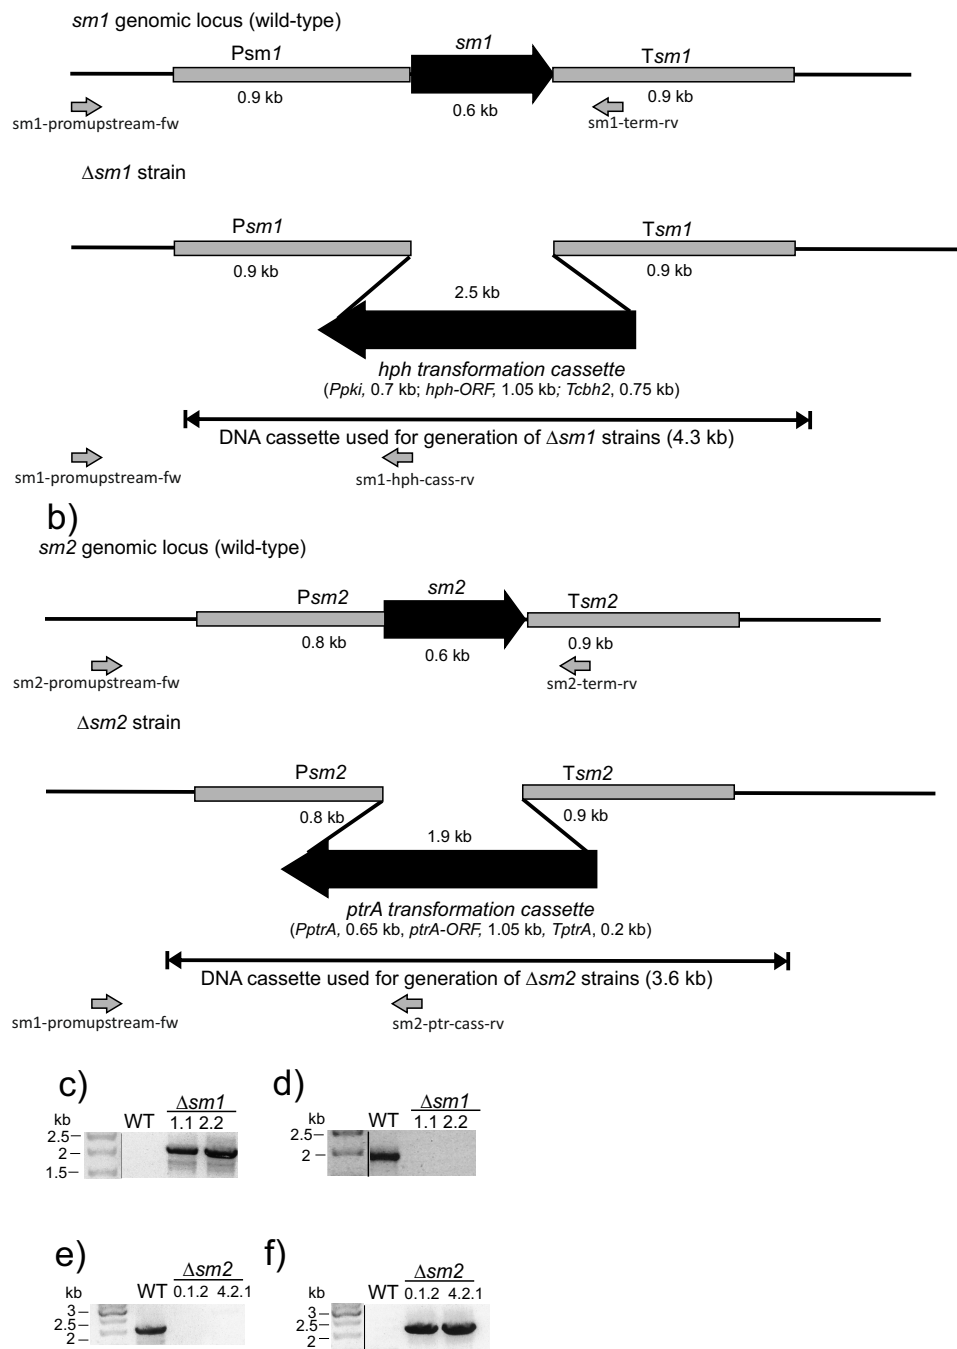

**FIG. S1.** Generation of *sm1* and *sm2* knockout strains. Genomic locus maps for the generation of (a)  $\Delta sm1$  and (b)  $\Delta sm2$ .

(a) In the parental strain ( $\Delta tku70$  strain) the *sm1* gene was replaced with the *hph*-gene from *Escherichia coli* (using the *Trichoderma reesei pki* promoter and *cbh2* terminator), enabling selection of transformants on medium containing hygromycin. (b) In the parental strain ( $\Delta tku70$  strain) the *sm2* gene was replaced with the *ptrA*-gene from *Aspergillus oryzae* (native promoter and terminator), enabling selection of transformants on medium containing pyrithiamine. (c-f) Identification and verification of *sm1* and *sm2* knockout strains. The positions of the primers used for identification of the knockout strains are indicated with arrows and the respective primer names. Primer sequences are listed in Supplementary Table 1.

(c) Identification of *sm1* knockout strains, yielding a 2.0 kb PCR product for knockout strains and (d) absence of the *sm1* wild-type locus, using the primers listed in Supplementary Table 1. Two positive *sm1* knockout strains (1.2 and 2.2 are shown). Strain 1.2 was used for further experiments. (e) Identification of *sm2* knockout strains, yielding a 2.0 kb band for the knockout locus and (f) absence of the *sm2* gene using the primers listed in Supplementary Table 1. Two positive *sm2* knockout strains (0.1.2 and 4.2.1 are shown). Strain 4.2.1 was used for further experiments.

Fig. S2

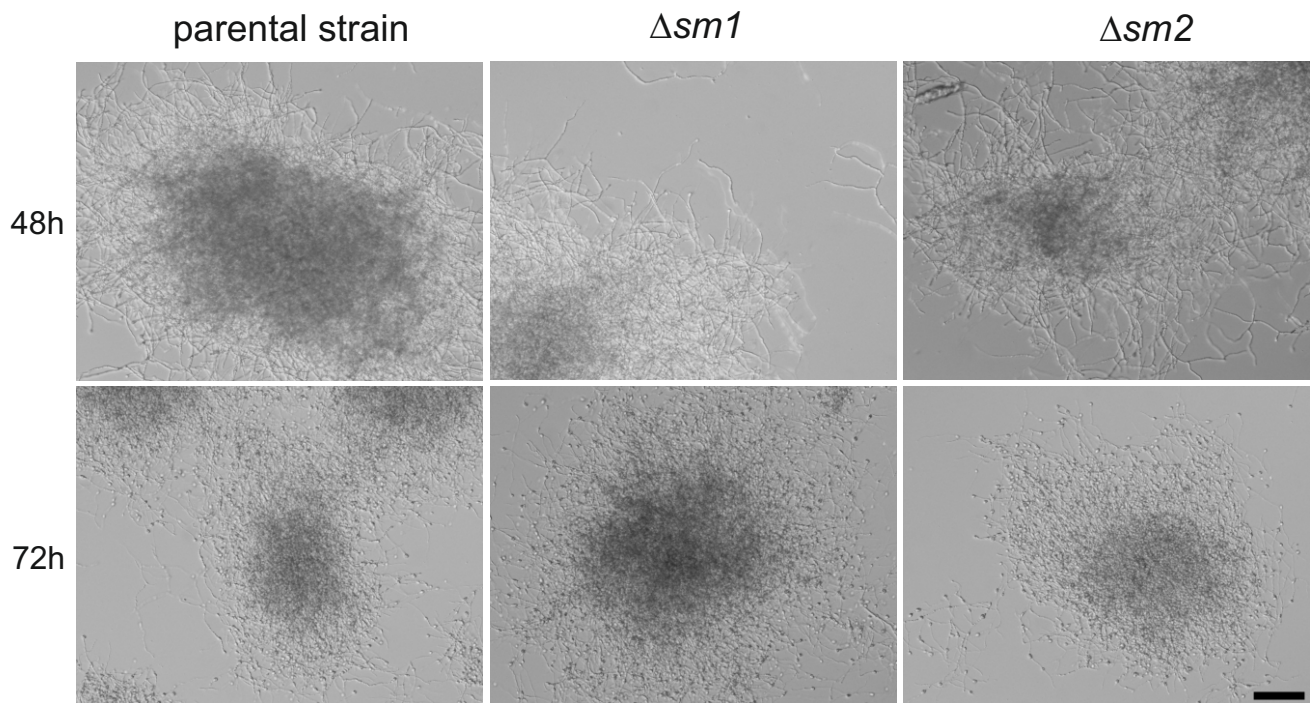

**FIG. S2.** Chlamydospore formation in *T. virens* shake flask cultivations.

Microscopic analysis of hyphal growth and chlamydospore formation of the *T. virens* parental strain,  $\Delta sm1$  and  $\Delta sm2$  knockout strains at the time points 48 h and 72 h. Scale bars = 100 $\mu$ m.

Fig. S3

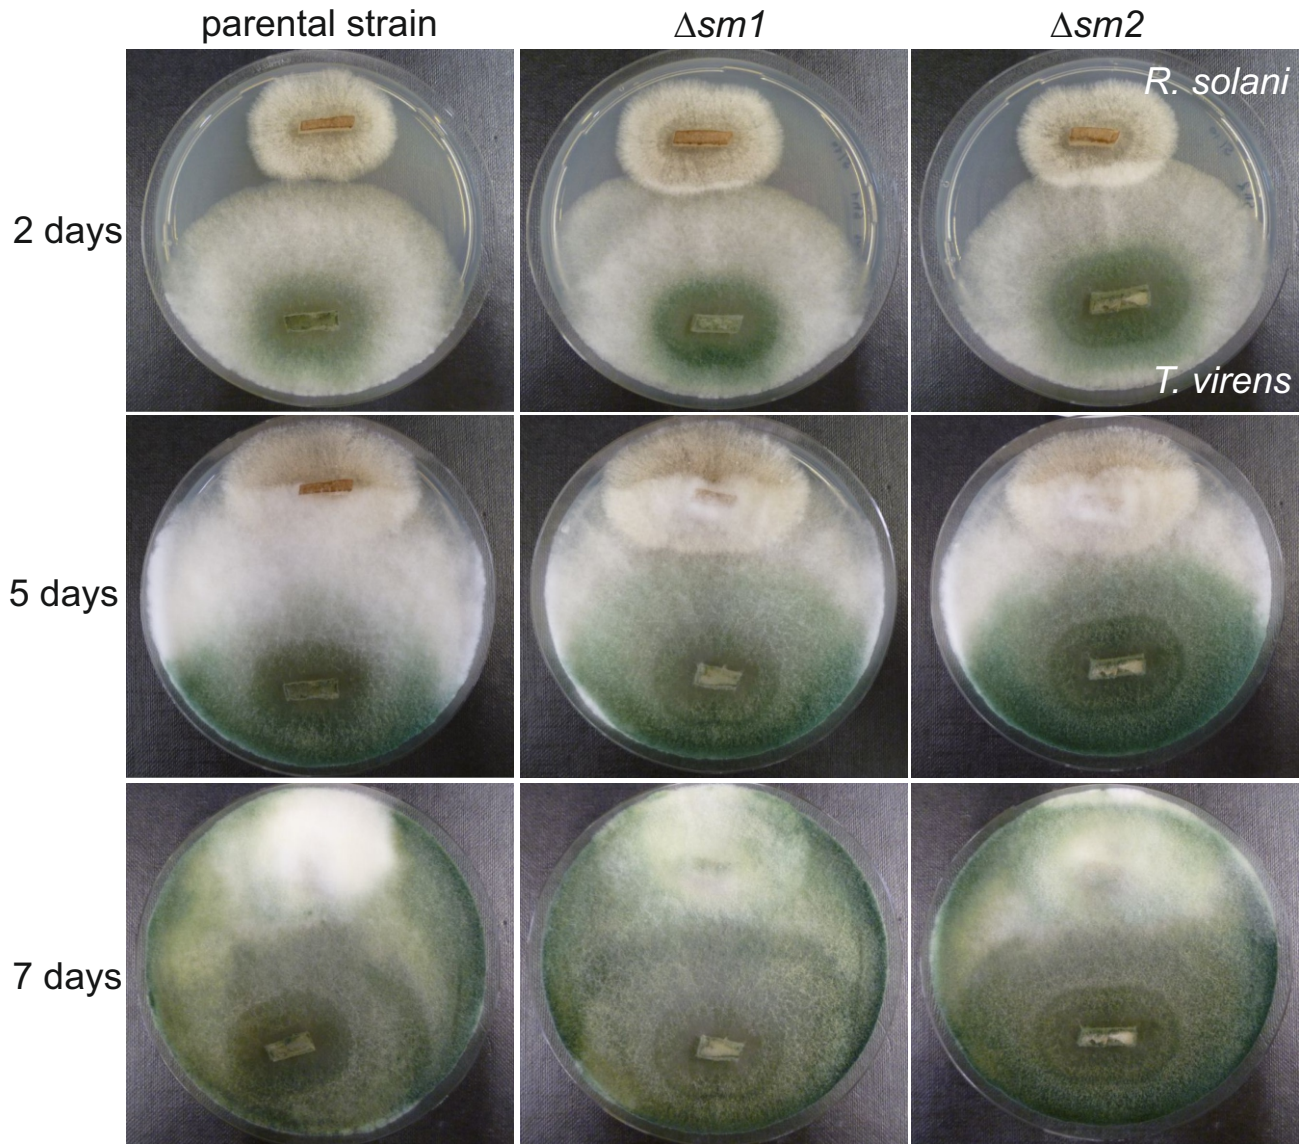

**FIG. S3.** Mycoparasitism confrontation assays of *T. virens* against *R. solani*.

# FIG. S4

a) Enhanced Product Ion scan for  $m/z = 327.1$  (precursor ion of gliotoxin) in strain I10

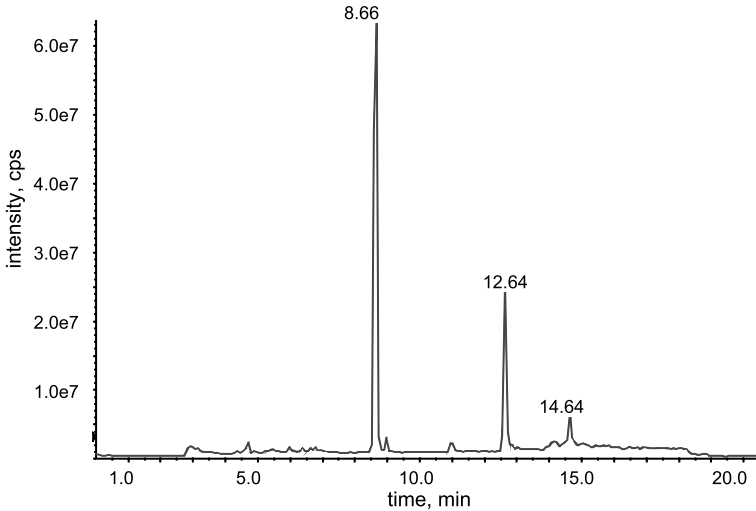

b) Product ion spectrum of the peak eluting at 8.66 min

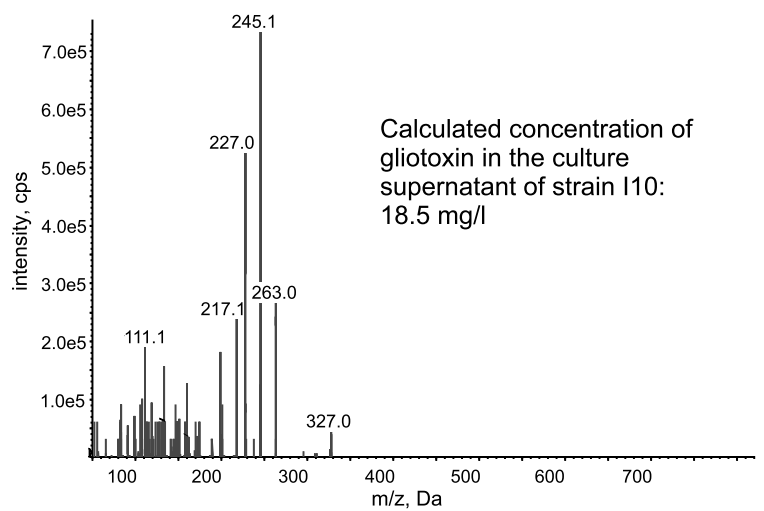

c) Enhanced Product Ion scan for  $m/z = 327.1$  in strain Gv29-8

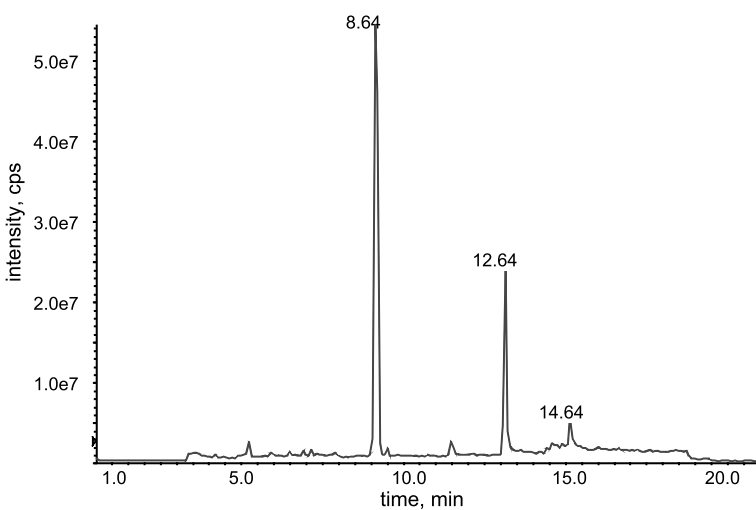

d) Product ion spectrum of the peak eluting at 8.64 min

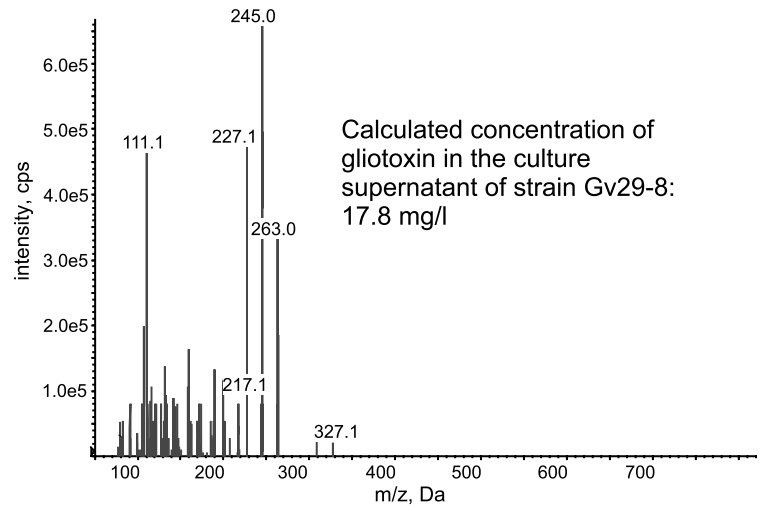

e) Reference spectrum of gliotoxin standard (purchased from Sigma-Aldrich)

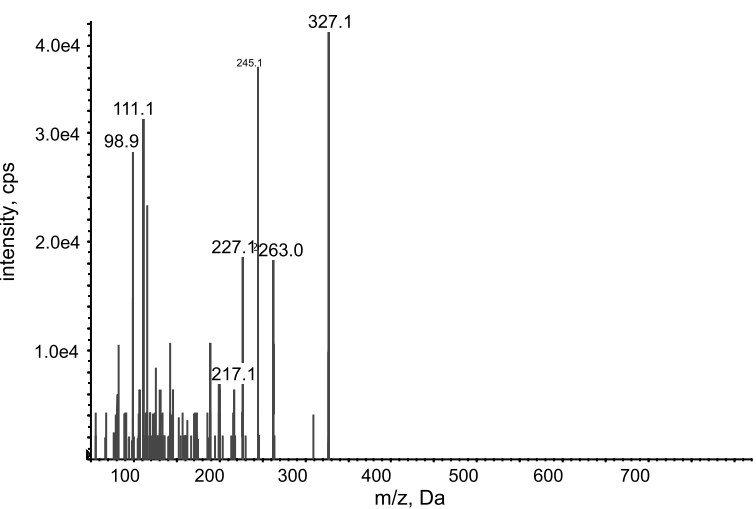

FIG. S4. Gliotoxin measurements of *T. virens* strains I10 and Gv29-8.

**SUPPLEMENTARY TABLE 1. Primers used in this study**

| <b>Primers for <i>sm1</i> and <i>sm2</i> knockout strains</b> |                                      |
|---------------------------------------------------------------|--------------------------------------|
| sm1-5'-fw                                                     | GTACCGGGCCCTCGAGTGAATTGAATGGATTGACTG |
| sm1-5'-rv                                                     | ACGAACGGTACTCGAGGCTTAACTGCGAGAATGG   |
| sm1-3'-fw                                                     | ACGGTAAAGCTTGATATCCATCTTCAAAGAAGTTCG |
| sm1-3'-rv                                                     | CTGCAGGAATTCGATATCAGCCGCTTACTTCTTCC  |
| sm1-promupstream-fw                                           | GAGAGAGTTCCATGGCG                    |
| sm1-term-rv                                                   | ATTCACGCCTGGCACAGA                   |
| sm1-hph-cass-rv                                               | TAGAAGTACTCGCCGATAGT                 |
| sm2-5'-fw                                                     | GTACCGGGCCCTCGAGCTGCGGCTACACATA      |
| sm2-5'-rv                                                     | ACGAACGGTACTCGAGATGGAGGCGAGTTAG      |
| sm2-3'-fw                                                     | ACGAACGGTAAAGCTTAATAGGAAAATGACGTG    |
| sm2-3'-rv                                                     | ATTCGATATCAAGCTTCAGACGATTATAAGCATGA  |
| sm2-promupstream-fw                                           | ATCATACTTGCCAAAGCGAC                 |
| sm2-term-rv                                                   | GTGATGTGGGAGTAGTGG                   |
| sm2-ptr-cass-rv                                               | CCACTTGCCACCGAAATG                   |
| <b>RT-PCR primers</b>                                         |                                      |
| tef1 fw                                                       | GTCGTTACCTTCGCTCCTTCCAA              |
| tef1 rv                                                       | CGGACTTGATGAACTTGGGGGC               |
| sm1 fw                                                        | CCAACATCTTCACTCTCGCTCTC              |
| sm1 rv                                                        | AATGTTGAAGCCAGAAGCAGCGTG             |
| sm2 fw                                                        | CCTCTTCAATGCTGCTACCCTC               |
| sm2 rv                                                        | GCCATCAGTAAGAGTGTCCAGTG              |
| sm3 fw                                                        | GCTGCCATTGTCGCCCCG                   |
| sm3 rv                                                        | CACCAATGAACCCAACCTGCGTC              |
| <b>qPCR primers</b>                                           |                                      |
| tef1 qPCR fw                                                  | CCACATTGCCTGCAAGTTCGC                |
| tef1 qPCR rv                                                  | GTCGGTGAAAGCCTCAACGCAC               |
| qPCR-SM1-fw sm1 rv                                            | GCTCGATGCCATGAATGCTCTG               |
| qPCR-SM1-rv sm2 rv                                            | TGAGTAGCGGTAGCAGAAACGC               |
| qPCR-SM2-fw sm3 rv                                            | CCTGCTCTGACGGTGTCAAT                 |
| qPCR-SM2-rv                                                   | GATACCTTGGACGCCACCAA                 |
